# Supplementary material
Source: PubMed Central journal article supplement (PMC5553032)
Supplement: JB.00101-17_zjb017174501s1.pdf [file JB.00101-17_zjb017174501s1.pdf]

1 **SUPPLEMENTARY MATERIAL**

2  
3  
4 Absence of the polar organizing protein PopZ results in reduced and asymmetric cell  
5 division in *Agrobacterium tumefaciens*

6  
7  
8 Matthew Howell<sup>a</sup>, Alena Aliashkevich<sup>b</sup>, Anne K. Salisbury<sup>c</sup>, Felipe Cava<sup>b</sup>, Grant R.  
9 Bowman<sup>c</sup>, and Pamela J.B. Brown<sup>a</sup>

10  
11 Division of Biological Sciences, University of Missouri, Columbia, Missouri, USA<sup>a</sup>;  
12 Department of Molecular Biology. Laboratory for Molecular Infection Medicine Sweden  
13 (MIMS), Umeå Centre for Microbial Research, Umeå University, Umeå, Sweden<sup>b</sup>,  
14 Department of Molecular Biology, University of Wyoming, Laramie, Wyoming, USA<sup>c</sup>

15  
16 Running Head: Deletion of *popZ* in *A. tumefaciens*

17  
18  
19  
20  
21 **1) SUPPLEMENTARY METHODS**

22 **2) SUPPLEMENTAL TABLES**

23 **3) SUPPLEMENTAL FIGURES AND LEGENDS S1 – S3**

24 **SUPPLEMENTARY METHODS**

25 **Western Blot Analysis of PopZ-GFP Fusions.** To detect PopZ-GFP fusions 3 ml  
26 cultures were grown in the absence of inducer for 8 hours, followed by overnight growth  
27 in the presence of 1 mM isopropyl- $\beta$ -D-1-thiogalactopyranoside (IPTG) as the inducer.  
28 The overnight cultures were diluted to an OD<sub>600</sub> of 0.3 and grown for an additional 4  
29 hours in the presence of inducer. 2 ml of culture was spun for 5 min at 7000 x g in a  
30 desktop centrifuge. Cell pellets were concentrated in GoldBio Bacterial Protein  
31 Extraction Lysis Buffer (GoldBio) with containing a protease inhibitor (ProBlock Gold)  
32 to an OD<sub>600</sub> of ~25 and lysed following the recommended protocol (GoldBio). Whole-  
33 cell lysates were cleared by centrifugation at 13,000 x g for 10 min. 1X Laemmli Sample  
34 Buffer was added to the cleared supernatents. The supernatents were boiled at 100°C  
35 prior to loading on an SDS 4-20% PAGE gel (GenScript) with recommended  
36 electrophoresis conditions. Proteins were electroblotted onto a PVDF membrane (Biorad)  
37 and blocked in 5% non-fat dry milk solubilized in TBST (1X TBS, 1% Tween-20)  
38 overnight. The blocked membranes were probed using anti-GFP monoclonal antibody  
39 (1:3000) in 2.5% nonfat milk solubilized in TBST for 2.5 hours. After washing, the  
40 membranes were incubated with anti-mouse HRP conjugated secondary antibody  
41 (1:3000) in 2.5% milk/TBST for 2.5 hours. The secondary antibody was detected using  
42 Clarity Western ECL Substrate (BioRad) for 10 min followed by SuperSignal West Pico  
43 Substrate (Thermo-Scientific) for an additional 10 min.

44

45 **Swim Plate Assay.** A fresh colony was picked with a pipette tip and stabbed into ATGN  
46 plates containing 0.3% agar followed by incubation in a sealed humid chamber for 7

47 days. Swim ring diameters were then measured. Each strain was tested using 8  
 48 independent colonies.  
 49  
 50 **Dual Labeling with NADA and DAPI.** Cells were grown in ATGN to exponential phase  
 51 and labeled with a green FDAA (NBD-amino-D-alanine; NADA) for 5 minutes and then  
 52 ethanol fixed. The cells were subsequently labeled with DAPI and imaged using phase  
 53 contrast and epifluorescence microscopy with an inverted Nikon Eclipse TiE and a  
 54 QImaging Rolera em-c<sup>2</sup> 1K EMCCD camera.

55  
 56 **SUPPLEMENTARY TABLES**

57  
 58 **Table S1.** Bacterial strains and plasmids used in this study.

| Strain or plasmid                  | Relevant characteristics                                                                                                            | Reference/Source |
|------------------------------------|-------------------------------------------------------------------------------------------------------------------------------------|------------------|
| <i>Plasmids</i>                    |                                                                                                                                     |                  |
| pSRKKm-Plac                        | Km <sup>r</sup> ; broad host range vector containing lacI <sup>q</sup> and lac promoter                                             | 15               |
| pKC129                             | Source of sfGFP                                                                                                                     | KC Huang Lab     |
| pSRKKm-Plac-sfgfp                  | pSRKKm vector containing lacI <sup>q</sup> and lac promoter with sfGFP                                                              | 13               |
| pSRKKM-Plac- <i>popZR1-sfgfp</i>   | Km <sup>r</sup> ; vector containing <i>popZR1-sfgfp</i> (bp 1-75).                                                                  | This study       |
| pSRKKM-Plac- <i>popZR2-sfgfp</i>   | Km <sup>r</sup> ; vector containing <i>popZR2-sfgfp</i> (bp 76-774).                                                                | This study       |
| pSRKKM-Plac- <i>popZR3-sfgfp</i>   | Km <sup>r</sup> ; vector containing <i>popZR3-sfgfp</i> (bp 775-999).                                                               | This study       |
| pSRKKM-Plac- <i>popZR1R2-sfgfp</i> | Km <sup>r</sup> ; vector containing <i>popZR1R2-sfgfp</i> (bp 1-774).                                                               | This study       |
| pSRKKM-Plac- <i>popZR2R3-sfgfp</i> | Km <sup>r</sup> ; vector containing <i>popZR2R3-sfgfp</i> (bp 76-999).                                                              | This study       |
| pSRKKM-Plac- <i>popZ-sfgfp</i>     | Km <sup>r</sup> ; vector containing <i>popZ-sfgfp</i> (full length).                                                                | This study       |
| pGB1246                            | Km <sup>r</sup> ; vector containing <i>fliM-eyfp</i>                                                                                | This study       |
| pSRKKM-Pqaz-sfgfp                  | Km <sup>r</sup> ; vector containing <i>A. tumefaciens</i> native <i>QAZ</i> promoter.                                               | This study       |
| pSRKKM-Pqaz-ftsA-sfgfp             | Km <sup>r</sup> ; vector containing <i>A. tumefaciens</i> native <i>QAZ</i> promoter followed by <i>ftsA-sfGFP</i> coding sequence. | This study       |
| pRVGFPC-2                          | Km <sup>r</sup> ; vector containing vanillate promoter which provides low constitutive expression in <i>A. tumefaciens</i>          | 14               |
| pSRKKM-Plac-ftsZ-sfgfp             | Km <sup>r</sup> ; Source of <i>ftsZ-sfgfp</i> .                                                                                     | This study       |
| pRV-ftsZ-sfgfp                     | Km <sup>r</sup> ; Constitutive expression of <i>ftsZ-sfgfp</i> ..                                                                   | This study       |
| <i>E. coli strains</i>             |                                                                                                                                     |                  |
| DH5α                               | Cloning strain                                                                                                                      | Life             |

|                                                    |                                                                                                    | Technologies |
|----------------------------------------------------|----------------------------------------------------------------------------------------------------|--------------|
| <i>A. tumefaciens</i> strains                      |                                                                                                    |              |
| C58C1                                              | C58 strain lacking pTiC58 plasmid                                                                  | Bowman Lab   |
| GB1163<br>C58C1 $\Delta popZ$                      | C58C1 with <i>popZ</i> replaced with spec resistance cassette                                      | 17           |
| GB1158<br>C58C1 $\Delta popZ::mchy-popZ$           | C58C1 $\Delta popZ$ with <i>mchy-popZ</i> integrated into the native locus                         | 17           |
| C58C1 pSRKKM <i>popZR1-sfgfp</i>                   | C58C1 with pSRKKM expressing <i>popZR1-sfgfp</i> under the <i>lac</i> promoter.                    | This study   |
| C58C1 pSRKKM <i>popZR2-sfgfp</i>                   | C58C1 with pSRKKM expressing <i>popZR2-sfgfp</i> under the <i>lac</i> promoter.                    | This study   |
| C58C1 pSRKKM <i>popZR3-sfgfp</i>                   | C58C1 with pSRKKM expressing <i>popZR3-sfgfp</i> under the <i>lac</i> promoter.                    | This study   |
| C58C1 pSRKKM <i>popZR1R2-sfgfp</i>                 | C58C1 with pSRKKM expressing <i>popZR1R2-sfgfp</i> under the <i>lac</i> promoter.                  | This study   |
| C58C1 pSRKKM <i>popZR2R3-sfgfp</i>                 | C58C1 with pSRKKM expressing <i>popZR2R3-sfgfp</i> under the <i>lac</i> promoter.                  | This study   |
| C58C1 pSRKKM <i>popZ-sfgfp</i>                     | C58C1 with pSRKKM expressing <i>popZ-sfgfp</i> under the <i>lac</i> promoter.                      | This study   |
| C58C1 $\Delta popZ$ pSRKKM <i>popZR1-sfgfp</i>     | C58C1 $\Delta popZ$ with pSRKKM expressing <i>popZR1-sfgfp</i> under the <i>lac</i> promoter.      | This study   |
| C58C1 $\Delta popZ$ pSRKKM <i>popZR2-sfgfp</i>     | C58C1 $\Delta popZ$ with pSRKKM expressing <i>popZR2-sfgfp</i> under the <i>lac</i> promoter.      | This study   |
| C58C1 $\Delta popZ$ pSRKKM <i>popZR3-sfgfp</i>     | C58C1 $\Delta popZ$ with pSRKKM expressing <i>popZR3-sfgfp</i> under the <i>lac</i> promoter.      | This study   |
| C58C1 $\Delta popZ$ pSRKKM <i>popZR1R2-sfgfp</i>   | C58C1 $\Delta popZ$ with pSRKKM expressing <i>popZR1R2-sfgfp</i> under the <i>lac</i> promoter.    | This study   |
| C58C1 $\Delta popZ$ pSRKKM <i>popZR2R3-sfgfp</i>   | C58C1 $\Delta popZ$ with pSRKKM expressing <i>popZR2R3-sfgfp</i> under the <i>lac</i> promoter.    | This study   |
| C58C1 $\Delta popZ$ pSRKKM <i>popZ-sfgfp</i>       | C58C1 $\Delta popZ$ with pSRKKM expressing <i>popZ-sfgfp</i> under the <i>lac</i> promoter.        | This study   |
| C58C1 pSRKKM-Pqaz- <i>ftsA-sfgfp</i>               | C58C1 with pSRKKM expressing <i>ftsA-sfgfp</i> under the <i>lac</i> native <i>qaz</i> promoter.    | This study   |
| C58C1 $\Delta popZ$ pSRKKM-Pqaz- <i>ftsA-sfgfp</i> | C58C1 $\Delta popZ$ with pSRKKM expressing <i>ftsA-sfgfp</i> under the native <i>qaz</i> promoter. | This study   |
| C58C1 pRV- <i>ftsZ-sfgfp</i>                       | C58C1 with pRV expressing <i>ftsZ-sfgfp</i> under the <i>van</i> promoter.                         | This study   |
| C58C1 $\Delta popZ$ pRV- <i>ftsZ-sfgfp</i>         | C58C1 $\Delta popZ$ with pRV expressing <i>ftsZ-sfgfp</i> under the <i>vanillate</i> promoter.     | This study   |
| GB1250<br>C58C1 $\Delta popZ::mchy-popZ$ pGB1246   | C58C1 $\Delta popZ::mchy-popZ$ with pSRKKM expressing YFP-FliM under the <i>lac</i> promoter       | This study   |
| GB1261<br>C58C1 $\Delta popZ$ pGB1246              | C58C1 $\Delta popZ$ pSRKKM expressing YFP-FliM under the <i>lac</i> promoter                       | This study   |

59  
60

61 **Table S2.** Synthesized DNA primers and gene fragments used in this study.

| Synthesized DNA    | Sequence                                                                                                                                                                                                                                                                                                                                                                                                                                                                                                                                                                                                                                                                                                                                                                                                                                                                                                                                                                                                                                                                                                   |
|--------------------|------------------------------------------------------------------------------------------------------------------------------------------------------------------------------------------------------------------------------------------------------------------------------------------------------------------------------------------------------------------------------------------------------------------------------------------------------------------------------------------------------------------------------------------------------------------------------------------------------------------------------------------------------------------------------------------------------------------------------------------------------------------------------------------------------------------------------------------------------------------------------------------------------------------------------------------------------------------------------------------------------------------------------------------------------------------------------------------------------------|
| Primers            |                                                                                                                                                                                                                                                                                                                                                                                                                                                                                                                                                                                                                                                                                                                                                                                                                                                                                                                                                                                                                                                                                                            |
| PopZ FL For NdeI   | 5'-CGC GAT CAT ATG GCT CAG CCA AGT GT -3'                                                                                                                                                                                                                                                                                                                                                                                                                                                                                                                                                                                                                                                                                                                                                                                                                                                                                                                                                                                                                                                                  |
| PopZ R1 Rev BamHI  | 5'-GTC GCT GGA TCC GCT TTC GAT GAT CCG-3'                                                                                                                                                                                                                                                                                                                                                                                                                                                                                                                                                                                                                                                                                                                                                                                                                                                                                                                                                                                                                                                                  |
| PopZ R2 For NdeI   | 5'-GTC GCT CAT ATG AAC GCG CCT GGA CCT-3'                                                                                                                                                                                                                                                                                                                                                                                                                                                                                                                                                                                                                                                                                                                                                                                                                                                                                                                                                                                                                                                                  |
| PopZ R2 Rev BamHI  | 5'-GTC GCT GGA TCC ATC CGC AAT GTG CGC-3'                                                                                                                                                                                                                                                                                                                                                                                                                                                                                                                                                                                                                                                                                                                                                                                                                                                                                                                                                                                                                                                                  |
| PopZ R3 For NdeI   | 5'-GTC GCT CAT ATG GGC CTG TCG CTC AAT-3'                                                                                                                                                                                                                                                                                                                                                                                                                                                                                                                                                                                                                                                                                                                                                                                                                                                                                                                                                                                                                                                                  |
| PopZ FL Rev BamHI  | 5'-GTC GCT GGA TCC GCG GCG CGA GCC GCG-3'                                                                                                                                                                                                                                                                                                                                                                                                                                                                                                                                                                                                                                                                                                                                                                                                                                                                                                                                                                                                                                                                  |
| FtsA For NdeI      | 5'-CGA CGC CAT ATG AGC TTT TTTGGT TC-3'                                                                                                                                                                                                                                                                                                                                                                                                                                                                                                                                                                                                                                                                                                                                                                                                                                                                                                                                                                                                                                                                    |
| FtsA Rev BamHI     | 5'-CGG CAC GGA TCC TCA AAA ACT TTC TTT C-3'                                                                                                                                                                                                                                                                                                                                                                                                                                                                                                                                                                                                                                                                                                                                                                                                                                                                                                                                                                                                                                                                |
| FtsZ For NdeI      | 5'-CGA CGC CAT ATG ACG ATA CAG CTG C-3'                                                                                                                                                                                                                                                                                                                                                                                                                                                                                                                                                                                                                                                                                                                                                                                                                                                                                                                                                                                                                                                                    |
| FtsZ Rev BamHI     | 5'-GCG TGA GGA TCC GTT GGA CTGGCG GCG C-3'                                                                                                                                                                                                                                                                                                                                                                                                                                                                                                                                                                                                                                                                                                                                                                                                                                                                                                                                                                                                                                                                 |
| sfGFP Rev NheI     | 5'-GCT CAG GCT AGC CTA TTT GTA GAG TTC-3'                                                                                                                                                                                                                                                                                                                                                                                                                                                                                                                                                                                                                                                                                                                                                                                                                                                                                                                                                                                                                                                                  |
| pSRK_FliM_FOR      | 5'-GAG CGG ATA ACA ATT TCA CAC AGG AAA CAG CAT ATG GCA<br>AAA GCT GCA GCG C-3'                                                                                                                                                                                                                                                                                                                                                                                                                                                                                                                                                                                                                                                                                                                                                                                                                                                                                                                                                                                                                             |
| 5'eYFP_ITCR_3'FliM | 5'-GCC CTT GCT CAT GGA TCC AGA TCC ACC CAT CAA ATG TCG<br>TAA GAT CTC-3'                                                                                                                                                                                                                                                                                                                                                                                                                                                                                                                                                                                                                                                                                                                                                                                                                                                                                                                                                                                                                                   |
| 3'FliM_ITC_5'eYFP  | 5'-TTG ATG GGT GGA TCT GGA TCC ATG AGC AAG GGC GAG GAG-3'                                                                                                                                                                                                                                                                                                                                                                                                                                                                                                                                                                                                                                                                                                                                                                                                                                                                                                                                                                                                                                                  |
| eYFP_pSRK_REV      | 5'-CCC TCG AGG TCG ACG GTA TCG ATA AGC TTT TAC TTG TAC AGC<br>TCG TCC ATG C-3'                                                                                                                                                                                                                                                                                                                                                                                                                                                                                                                                                                                                                                                                                                                                                                                                                                                                                                                                                                                                                             |
| Gene Fragments     |                                                                                                                                                                                                                                                                                                                                                                                                                                                                                                                                                                                                                                                                                                                                                                                                                                                                                                                                                                                                                                                                                                            |
| QAZ promoter       | 5'-GGTAGAACGAAGCGGCGTCGAAGCCTGTAAAGCGGCGGTGCACAA<br>TCTTCGAATTCGTAGCTGAGCTTGGACTCCTGTTGATAGATCCAGTAA<br>TGACCTCAGAACTCCATCTGGATTTGTTTCAGAACGCTCGGTTGCCGCC<br>GGGCGTTTTTTATTGGTGAGAATCCAAGCTAGACTGCGATGAGTGGCA<br>GGGGTAATGACTCTCTAGCTTGAGGCATCAAATAAAACGAAAGGCTC<br>AGTCGAAAGACTGGGCCTTTTCGTTTTATCTGTTGTTTGTCTGGTGAACG<br>CCTCCTGAGTAGGACAAATCCGCCGCTAGGAGCTTTCGGCCACTAGTG<br>TTTGGGTTCCATTCAGATGATTGGAATGTCATGCCTTGGAAAGGCAGG<br>GACTGCGTTAACGCAATTTTTGTTCTATGGAATGCTAAAAAAGAAAT<br>AATGCAAATAATGTGATTGTTGAACACCGCAGGCTCGCAATGCACTG<br>CCGGTCACGGTGCTGCGATTGAGAGACTGATTCAGGCCGCGGATTTAA<br>AATGCTGAAACGCCAGATAATTTGTCTGGGGAATAAGCCCGTCTGTT<br>AACGTTTCGACCTTGCTTCATCGCGAAGTGCGAACCAGCCAGGCG<br>GTTTTATTTCCGATCATTGAAAACCTGCATGTTGCAATCCGTACAACCTC<br>TCTGATTCCAAGGAGGTAATCGGGATTGATGCTGATTCTTTAACGGAA<br>CTCGGCATGTTGGACGCGGCGTTAACGAAAGTAAACGATTCATTAA<br>CCTTAATGGCGTTTAACTGATCTCAAGGATCATGTGCCAGAATCACCG<br>TCCGTTTCATTCGGTCGGTTTGGACATGGTTCGTAATGGAGAGTTGGT<br>GTCAGAGGGTTCGCATATGCCTGCAGGCGCCTTAATTAATATGCATGG<br>TACCTTAACATCTCGAGCTCCGGGATCCGCTGGCTCCGCTGCTGGTTT<br>TGGCAAGCTTGGCGTGTCTAAAGGTG -3' |

62

63

64

65 SUPPLEMENTAL FIGURES  
66

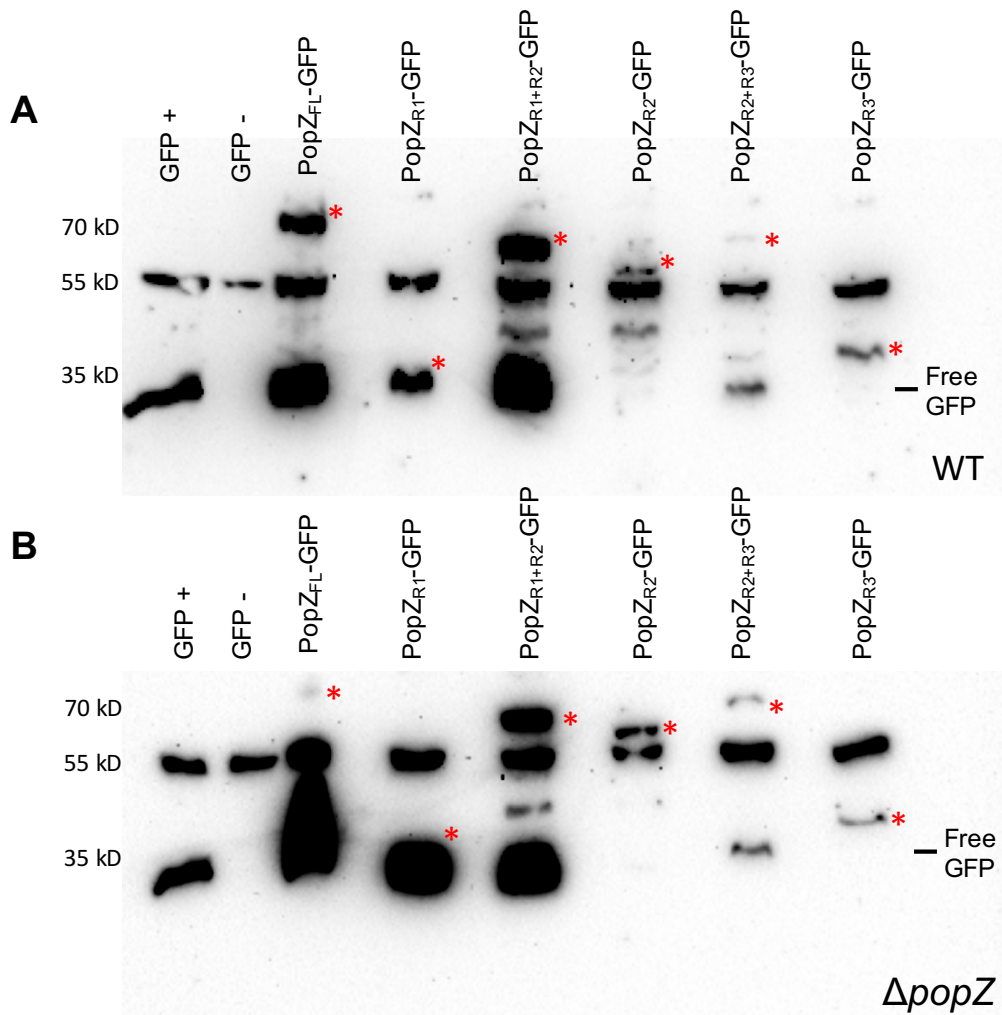

67  
68  
69  
70 **Supplemental Figure S1.** Western blot analysis of PopZ-GFP fusions. Western Blot  
71 analysis of PopZ-GFP fusion strains in wildtype (A) and  $\Delta popZ$  (B) after overnight  
72 induction with IPTG using a monoclonal anti-GFP antibody. The position of each PopZ  
73 fragment fused with GFP is shown with a red asterisk. The position of free GFP on each  
74 blot is indicated. A cross reacting band is present in all samples near 55 kD.

75  
76  
77  
78  
79  
80  
81  
82

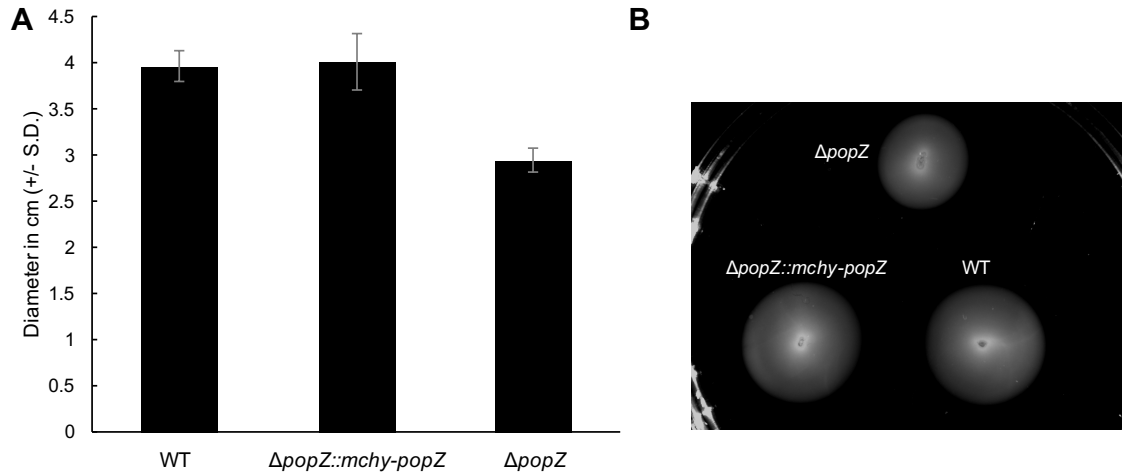

83  
84  
85  
86  
87  
88  
89  
90  
91

**Supplemental Figure S2.**  $\Delta popZ$  cells are motile. Indicated strains were assayed for motility on ATGN soft agar for 7 days. A. The average swim ring diameter and standard deviation was determined for each strain. Data were collected from 8 independent experiments. B) Representative image of swim rings formed by each strain after 7 days.

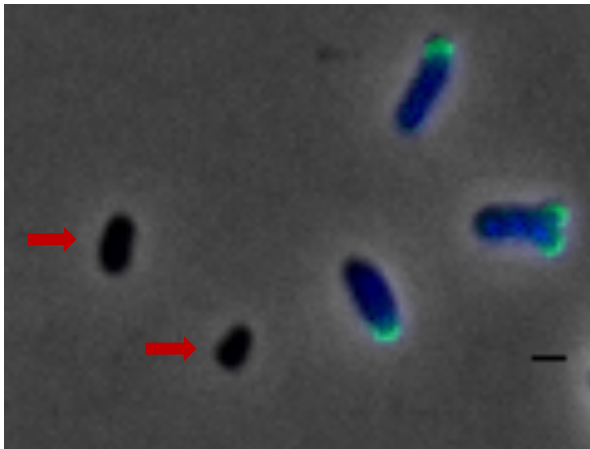

92  
93  
94  
95  
96  
97  
98

**Supplemental Figure S3.** Small cells lack peptidoglycan synthesis and DNA. Representative image of  $\Delta popZ$  cells dual labeled with NADA (green) and DAPI (blue). Red arrows indicate two cells smaller than 1.5  $\mu m$ . Scale bar is 1  $\mu m$ . Quantitation of labeling patterns in small cells reveals that 95% of small cells that lack NADA labeling also do not label with DAPI (98/103).
